# Supplementary material for: A wrinkled structure with broadband and omnidirectional light-trapping abilities for improving the performance of organic solar cells with low defect density
Source: Royal Society of Chemistry journal article supplement (doi:10.1039/c9nr08477k), 2019-01-01
Supplement: c9nr08477k1.pdf [file c9nr08477k1.pdf]

## Electronic supplementary information

### Wrinkle structure with broadband and omnidirectional light-trapping capabilities for improving performance of organic solar cell with low defect density

Kong Liu,<sup>\*a,b</sup> Yang Sun,<sup>a,b</sup> Qicong Li,<sup>a,b</sup> Cheng Yang,<sup>a,b</sup> Muhammad Azam,<sup>a,b</sup> Zhijie Wang,<sup>a,b</sup> Shengchun Qu<sup>a,b</sup> and Zhanguo Wang<sup>a,b</sup>

<sup>a</sup> Key Laboratory of Semiconductor Materials Science, Beijing Key Laboratory of Low Dimensional Semiconductor Materials and Devices, Institute of Semiconductors, Chinese Academy of Sciences, Beijing 100083, China.

<sup>b</sup> Center of Materials Science and Optoelectronics Engineering, University of Chinese Academy of Sciences, Beijing 100049, China.

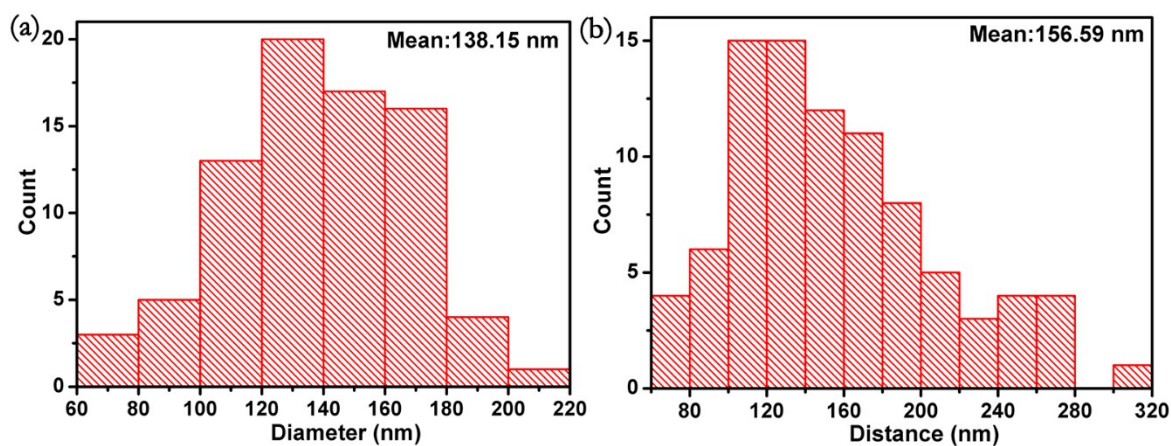

Fig. S1 (a) Diameter and (b) edge distance distributions of AgNPs array.

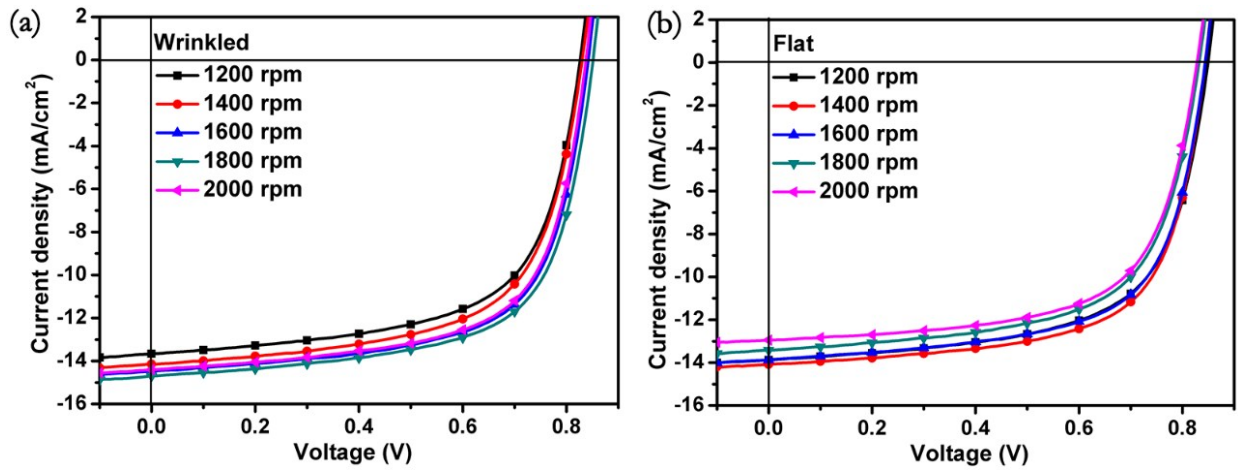

Fig. S2  $J$ - $V$  characteristics of (a) wrinkled, (b) flat solar cells fabricated using different active layer spin-coating speed.

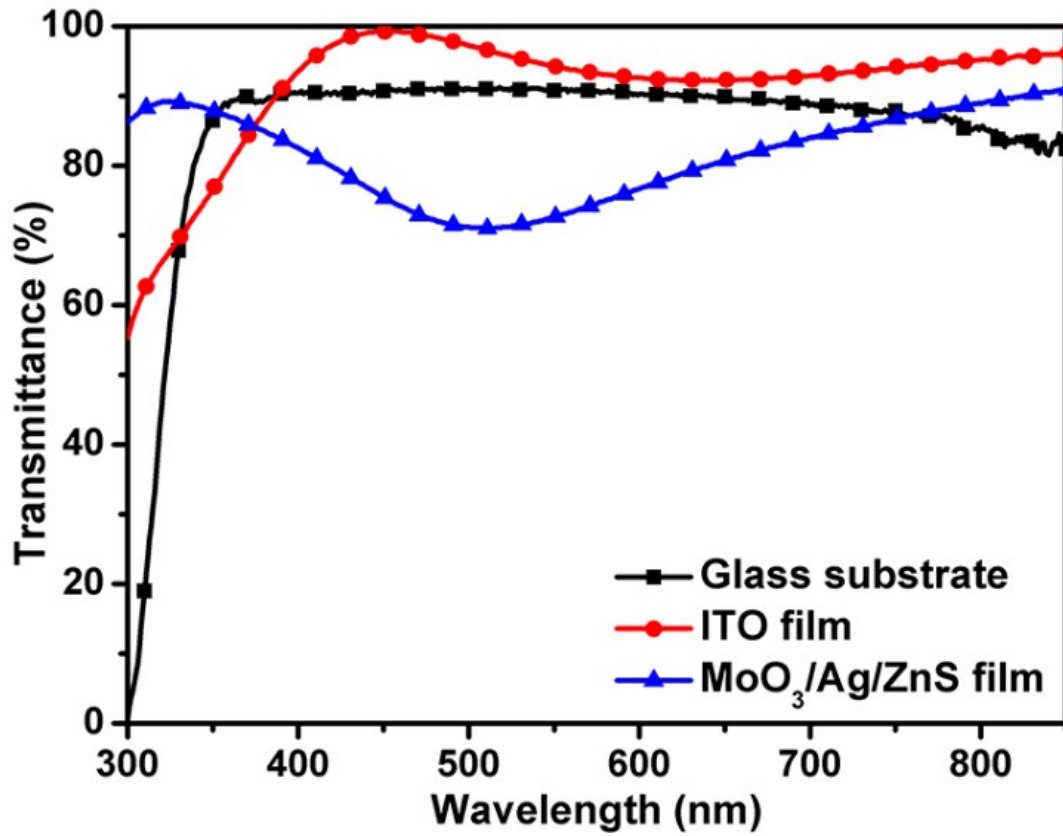

Fig. S3 Transmittance spectra of glass substrate, ITO film and  $\text{MoO}_3/\text{Ag}/\text{ZnS}$  transparent electrode.

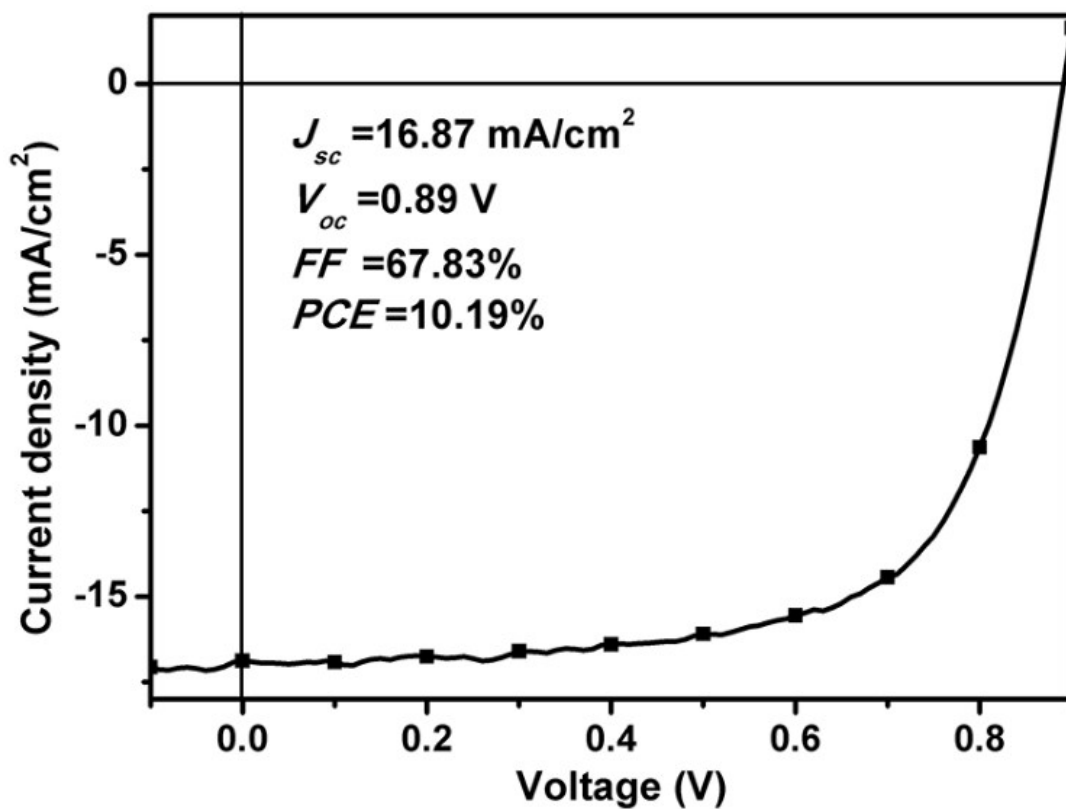

Fig. S4 *J-V* characteristics of solar cell based on flat ITO/glass substrate.

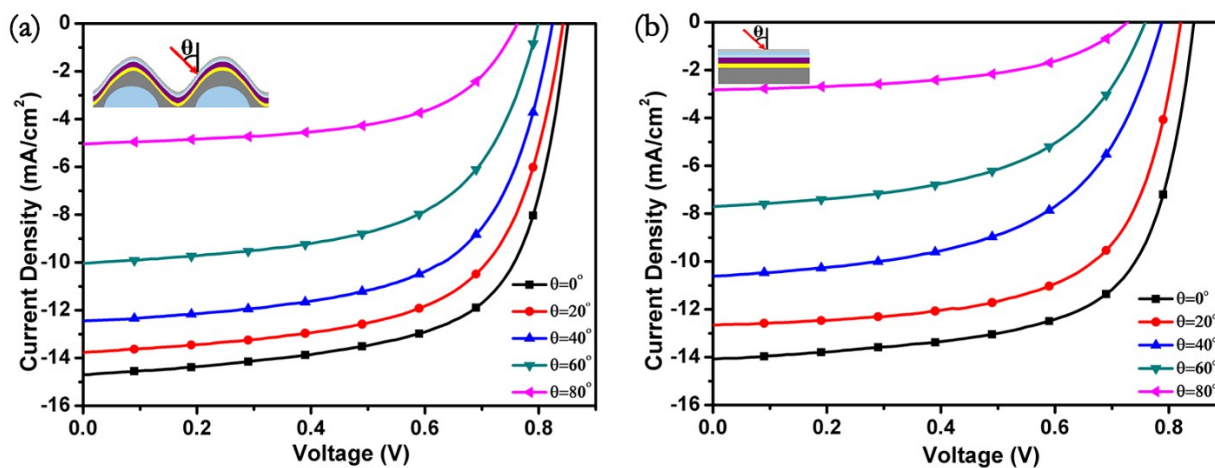

Fig. S5 *J-V* characteristics of (a) wrinkled and (b) flat solar cells under different incident angle.

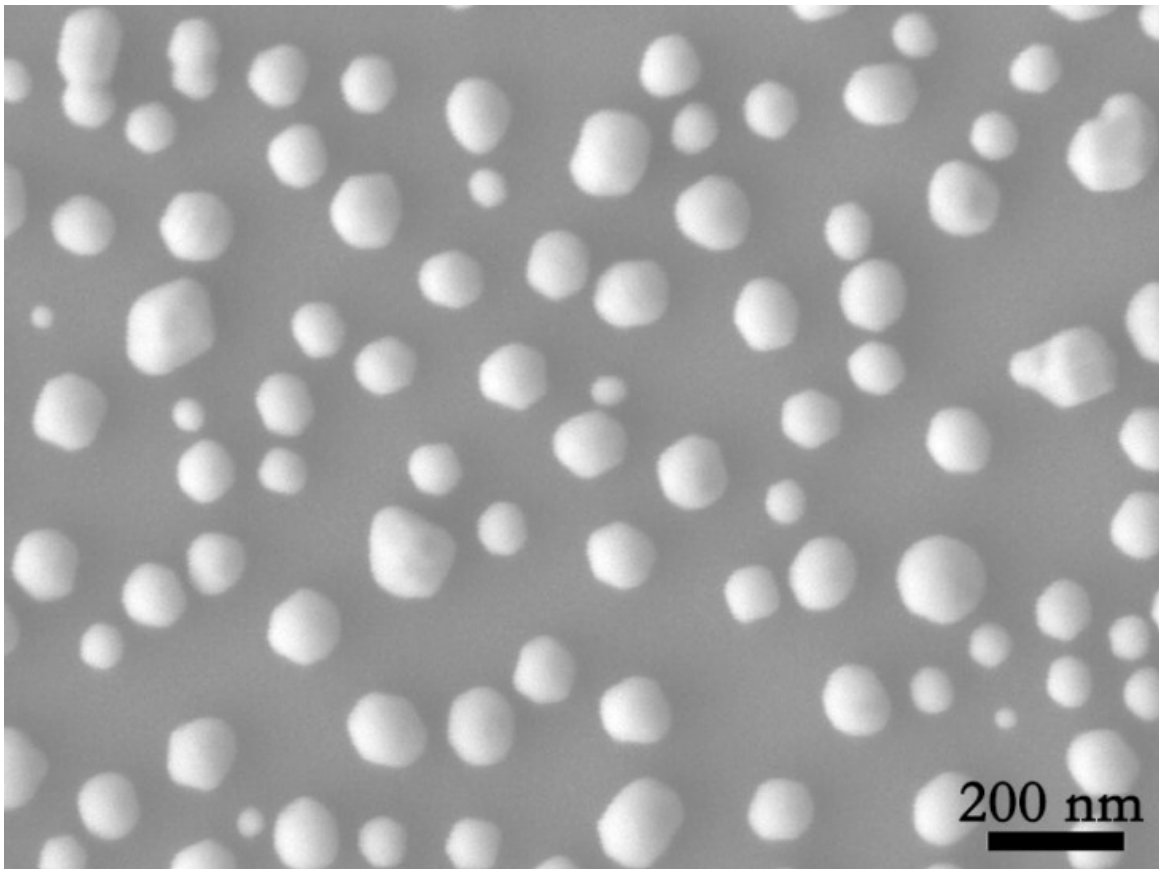

**Fig. S6** Surface SEM image of non-spherical AgNPs with sharp edge.

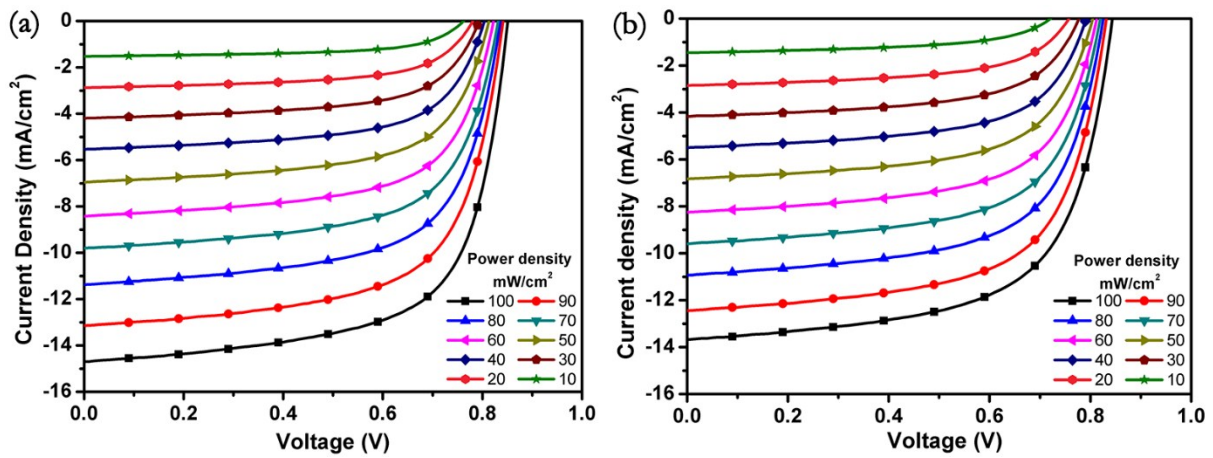

**Fig. S7** *J-V* characteristics of solar cells based on (a) spherical and (b) non-spherical AgNPs array under various light intensities ranging from 100 mW cm<sup>-2</sup> to 10 mW cm<sup>-2</sup>.
